# Supplementary material for: Overactive Error-Related Brain Activity as a Candidate Endophenotype for Obsessive-Compulsive Disorder: Evidence From Unaffected First-Degree Relatives
Source: Atypon-hosted journal article supplement (doi:10.1176/appi.ajp.2010.10030416), 2010-12-02
Supplement: ajp_168_03_317_01.pdf [file ajp_168_03_317_01.pdf]

## **Data Supplement**

### **Expanded Results**

#### **Event-related potential data**

Trials including excessive EEG artifacts, anticipatory (< 100 ms) or slow responses were excluded from ERP analysis. Supplemental Table 1 displays the total number of trials that were removed in each group. Groups did not differ in the number of rejected trials.

#### **Behavioral results**

Every 60 trials participants received a feedback based on their previous performance. Supplemental Table 2 presents the mean percentage (and standard deviation) of feedbacks received in the three groups.

#### **Difference waveforms**

An additional repeated-measurement analysis of variance was used to examine difference waveforms that were obtained by subtracting the signal on correct trials from the signal on erroneous trials. These waveforms were analyzed using *electrode* as within-subject and *group* as between-subject factor. A significant main effect of *electrode* was observed ( $F=83,99$ ,  $df=2,174$ ,  $p<0.001$ ,  $\epsilon=0.61$ ). The difference was largest at Cz compared to Fz and FCz, that did not differ. Groups differed in difference waveforms ( $F=3,15$ ,  $df=2,87$ ;  $p<0.05$ ). Patients and relatives showed greater difference waveforms than comparison subjects but this difference did not reach significance (patients vs. comparison subjects:  $p=0.07$ , relatives vs. comparison subjects:  $p=0.13$ ). This smaller group effect seen in the difference waves compared to the analyses of original waveforms is due to the fact that both error-related

negativity and (to a lesser extend) correct-related negativity amplitudes were increased in OCD patients and relatives.

### **Error positivity**

The error positivity was determined as mean amplitude in the time windows 300-500 ms post-response and was compared between groups with an analysis of variance including the within-subject factors *electrode* (CPz vs. Pz) and *response type* (correct vs. incorrect). Averaged waveforms for correct and incorrect responses at a parietal electrode site (CPz) are displayed in the supplemental Figure 1. The error positivity was larger for incorrect than for correct responses ( $F=299.33$ ,  $df=1,87$ ,  $p<0.01$ ) and this difference was more pronounced at CPz ( $F=8.24$ ,  $df=2,87$ ,  $p<0.01$ ). A trend-like interaction between group and response type was also found ( $F=2.49$ ,  $df=2,87$ ,  $p=0.09$ ). This trend is due to a numerically but nonsignificant greater difference between incorrect and correct responses in the patients group compared to unaffected relatives and comparison subjects ( $p\text{-values}>0.25$ ).

### **Correlation results**

Supplemental Table 3 presents correlations of error-related negativity amplitudes with symptom scores and behavioral measures, separately for the three groups.

## Supplemental Tables and Figures

**Supplemental Figure 1:** Response-locked grand average waveforms for OCD patients (left), unaffected first-degree relatives (middle) and healthy comparison subjects (right), recorded at CPz, for correct and erroneous responses.

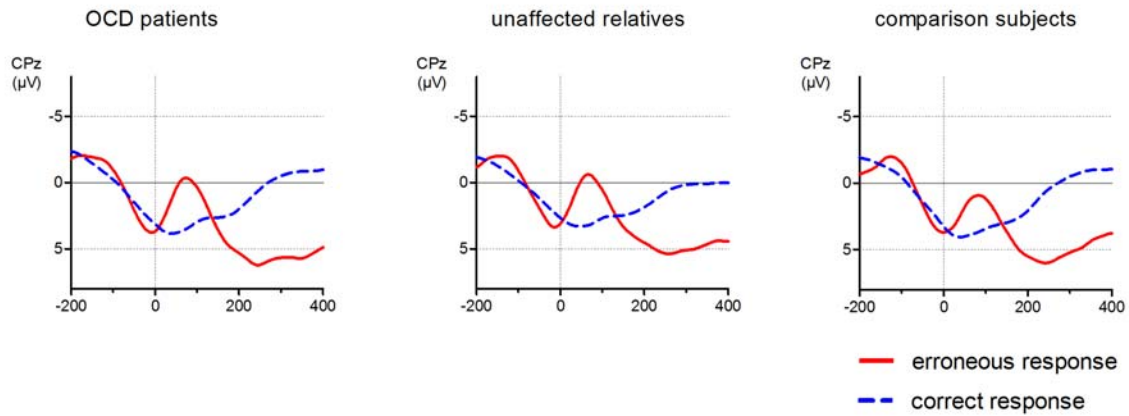

**Supplemental Table 1:** Number of rejected trials based on reaction time criteria or due to EEG artifacts as a function of group.

|                                   | OCD patients<br>(N=30) | First-degree<br>relatives (N=30) | Comparison<br>subjects (N=30) |
|-----------------------------------|------------------------|----------------------------------|-------------------------------|
| <b>Trials (n) rejected due to</b> |                        |                                  |                               |
| EEG-artifacts                     | 1497                   | 1341                             | 2037                          |
| Reaction times below 100 ms       | 7                      | 3                                | 13                            |
| Reaction times over 700 ms        | 40                     | 60                               | 76                            |
| No reactions                      | 162                    | 118                              | 128                           |

**Supplemental Table 2:** Percentage of specific feedback types received, separately for groups.

|                           | OCD patients<br>(N=30) |    | First-degree<br>relatives (N=30) |    | Comparison<br>subjects (N=30) |    |
|---------------------------|------------------------|----|----------------------------------|----|-------------------------------|----|
| <b>Feedback</b>           | Mean                   | SD | Mean                             | SD | Mean                          | SD |
| Respond faster            | 79                     | 19 | 80                               | 22 | 63                            | 25 |
| Respond fast and accurate | 20                     | 20 | 18                               | 18 | 33                            | 24 |
| Respond more accurately   | 1                      | 3  | 2                                | 8  | 5                             | 9  |

**Supplemental Table 3:** Pearson's  $r$  coefficients for correlations of error-related negativity amplitudes at FCz with clinical and performance measures, separately for OCD patients, unaffected first-degree relatives and healthy comparison subjects.

| Measures                                     | OCD Patients<br>(N=30) |      | First-degree relatives<br>(N=30) |      | Comparison subjects<br>(N=30) |      |
|----------------------------------------------|------------------------|------|----------------------------------|------|-------------------------------|------|
|                                              | r                      | p    | r                                | p    | r                             | p    |
| <b>Clinical</b>                              |                        |      |                                  |      |                               |      |
| Obsessive-Compulsive<br>Inventory-Revised    | -0.16                  | 0.41 | 0.15                             | 0.43 | 0.12                          | 0.52 |
| washing                                      | -0.35                  | 0.06 | 0.16                             | 0.38 | 0.26                          | 0.18 |
| checking                                     | 0.22                   | 0.24 | 0.27                             | 0.15 | -0.13                         | 0.49 |
| ordering                                     | 0.04                   | 0.85 | 0.03                             | 0.87 | 0.11                          | 0.57 |
| obsessing                                    | -0.13                  | 0.48 | 0.06                             | 0.74 | 0.11                          | 0.56 |
| hoarding                                     | -0.03                  | 0.88 | 0.03                             | 0.87 | 0.23                          | 0.23 |
| neutralizing                                 | -0.34                  | 0.07 | 0.07                             | 0.71 | -0.20                         | 0.29 |
| Beck-Depression-Inventory II                 | 0.17                   | 0.37 | 0.22                             | 0.24 | 0.06                          | 0.76 |
| Yale-Brown Obsessive-<br>Compulsive Scale    | -0.32                  | 0.09 | -                                | -    | -                             | -    |
| Montgomery-Åsberg<br>Depression Rating Scale | 0.07                   | 0.72 | -                                | -    | -                             | -    |
| <b>Task Performance</b>                      |                        |      |                                  |      |                               |      |
| Number of Errors                             | 0.27                   | 0.15 | -0.25                            | 0.18 | 0.11                          | 0.57 |
| Error Reaction Time (ms)                     | 0.19                   | 0.31 | 0.26                             | 0.16 | -0.08                         | 0.66 |

Note: reported p-values are uncorrected for multiple comparisons
